# Supplementary material for: Integrated Genomics Identifies miR-181/TFAM Pathway as a Critical Driver of Drug Resistance in Melanoma
Source: PubMed Central journal article supplement (PMC7918089; doi:10.3390/ijms22041801), 2021-02-11
Supplement: ijms-22-01801-s001.pdf [file ijms-22-01801-s001.pdf]

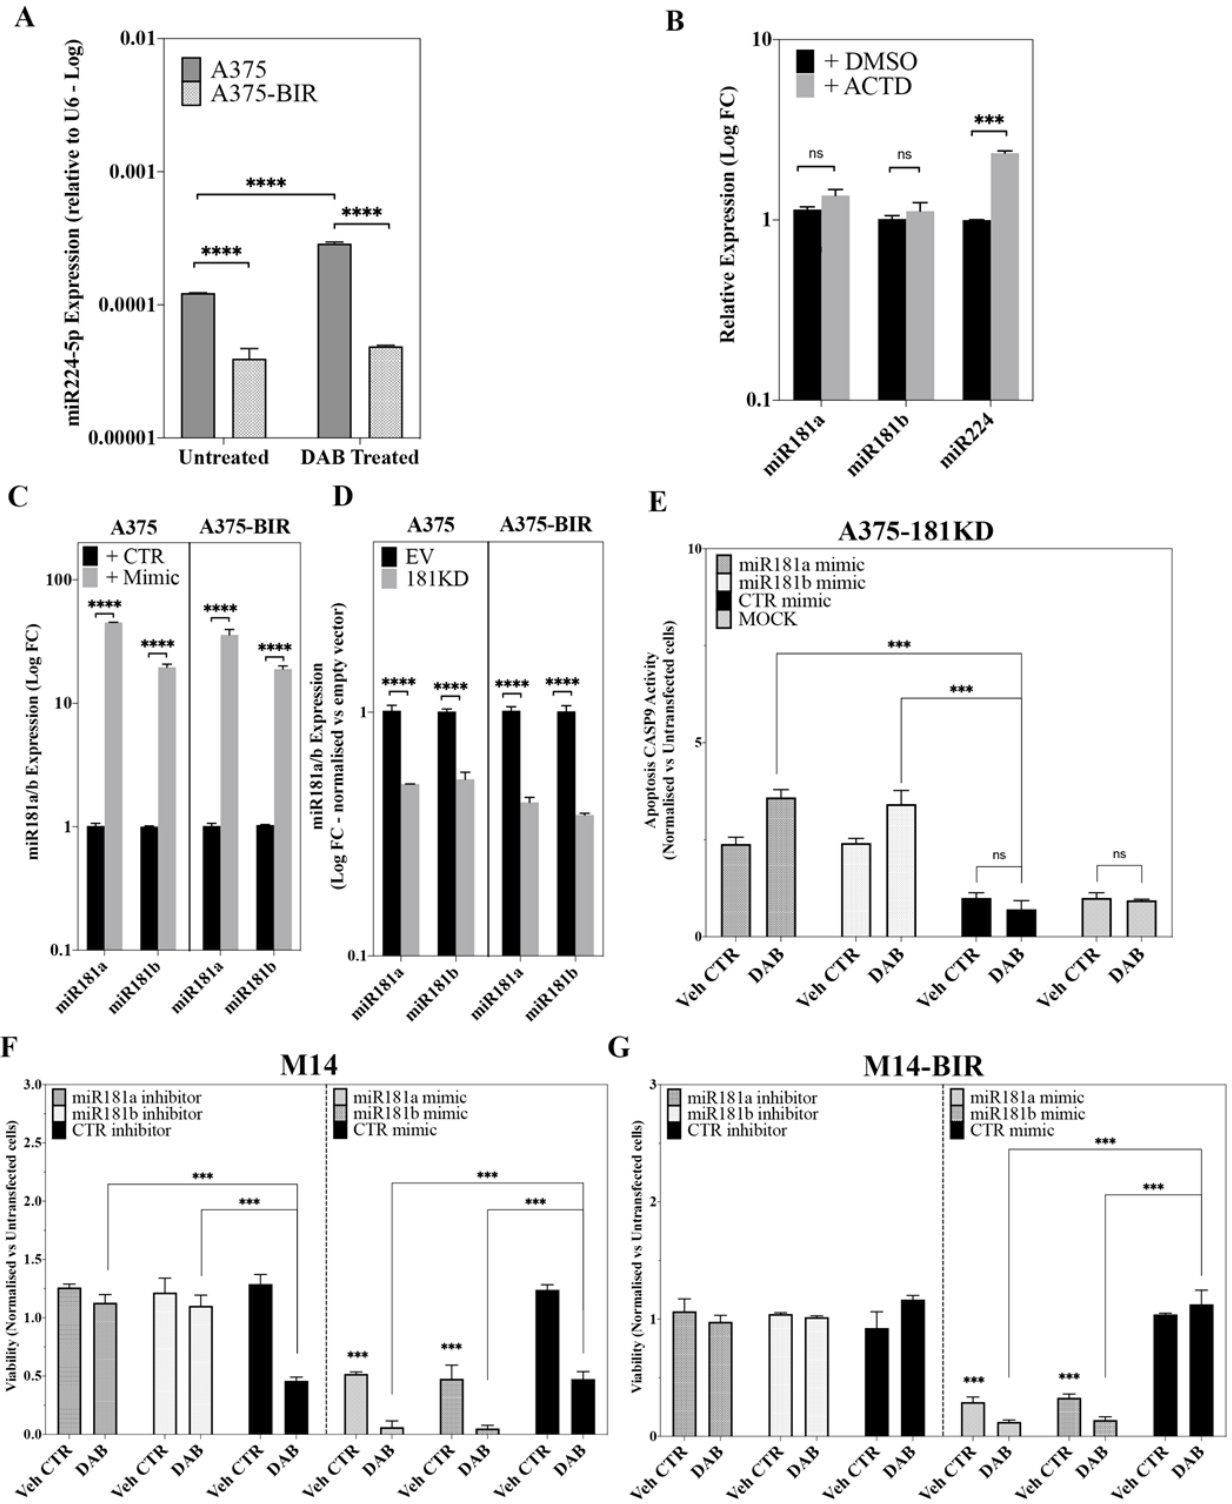

**Supplementary Figure S1.** A) The expression levels of miR-224 in A375, A375-BIR melanoma cells, measured by qRT-PCR. B) The expression levels of miR-181a, -181b and miR-224 in A375, melanoma cells, treated with 5nM Actinomycin D (ACTD) and vehicle control (DMSO), measured by qRT-PCR. The miRNA expression levels were normalized to the internal control U6. \*\*\*p < 0.001; ns, not significantly. C) The expression levels of miR-181a, -181b in A375 and A375-BIR melanoma cells transfected with mimic and CTR; D) The expression levels of miR-181a, -181b in A375 and A375-BIR

melanoma cells transfected with miR181a/b sponge (181KD) and pcDNA3.1-GFP used as empty vector CTR; E) Effect of miRNA-181a and b forced expression or inhibition on CASP-9 activation in A375-181KD cells. The determination of CASP-9 activity was carried out by using Caspase-Glo® 9 assay. Data are expressed in fold change relative to vehicle control +/-SD of three independent assays with 3 replicates each one. \*\*\* $P < 0.001$ , and \* $P < 0.01$  versus vehicle control; ns, not significant; F-G) M14 (F) and M14-BIR (G) cells transiently transfected with 40 nM of the miR-181a and -181b mimic or inhibitor or the appropriate controls were treated with 200nM dabrafenib and assayed for proliferation by the MTT assay. Data are expressed in terms of percentage of cell viability as compared to untransfected cells. Each value represents the arithmetic mean of three independent experiments performed with triplicate samples. \*\*\* $P < 0.001$ ; \* $P < 0.01$ .

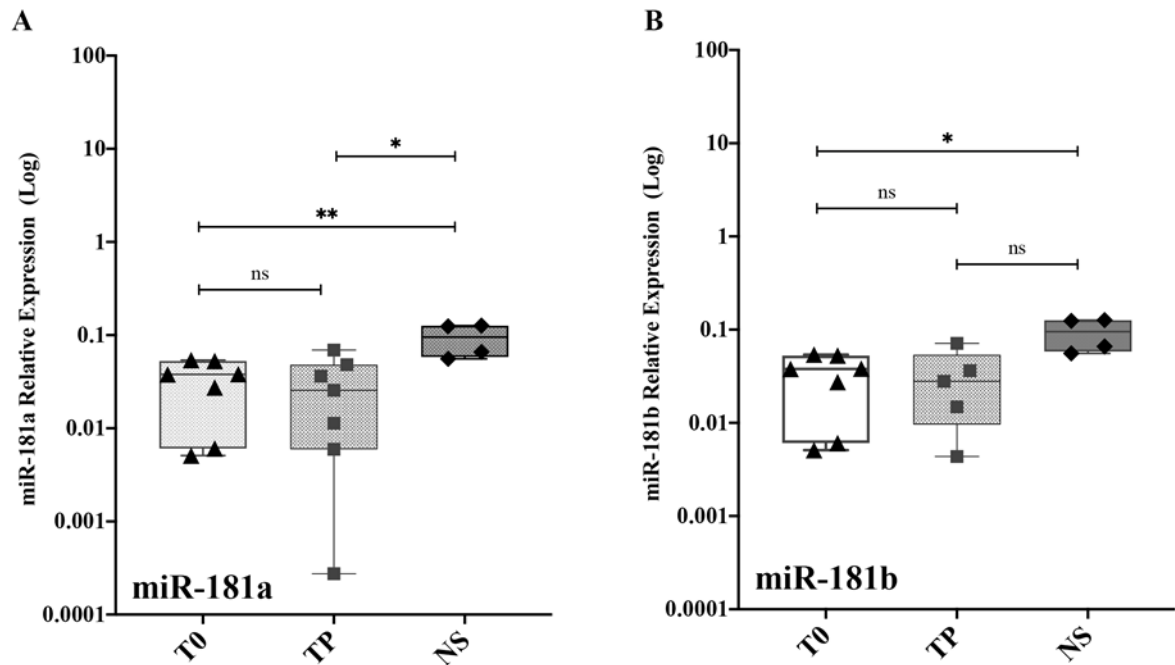

**Supplementary Figure S2.** A-B) Box-and-whisker diagrams of miRNA-181a (A) and -181b (B) levels in melanoma patients before the start of therapy (pre-treatment), after treatment (post-treatment) and in normal skin sample. The horizontal bar within each box indicates the median. Data were analysed by non-parametric Wilcoxon matched-pairs signed-rank test. \*\* $P < 0.001$ ; \* $P < 0.01$ ; ns = not significant.

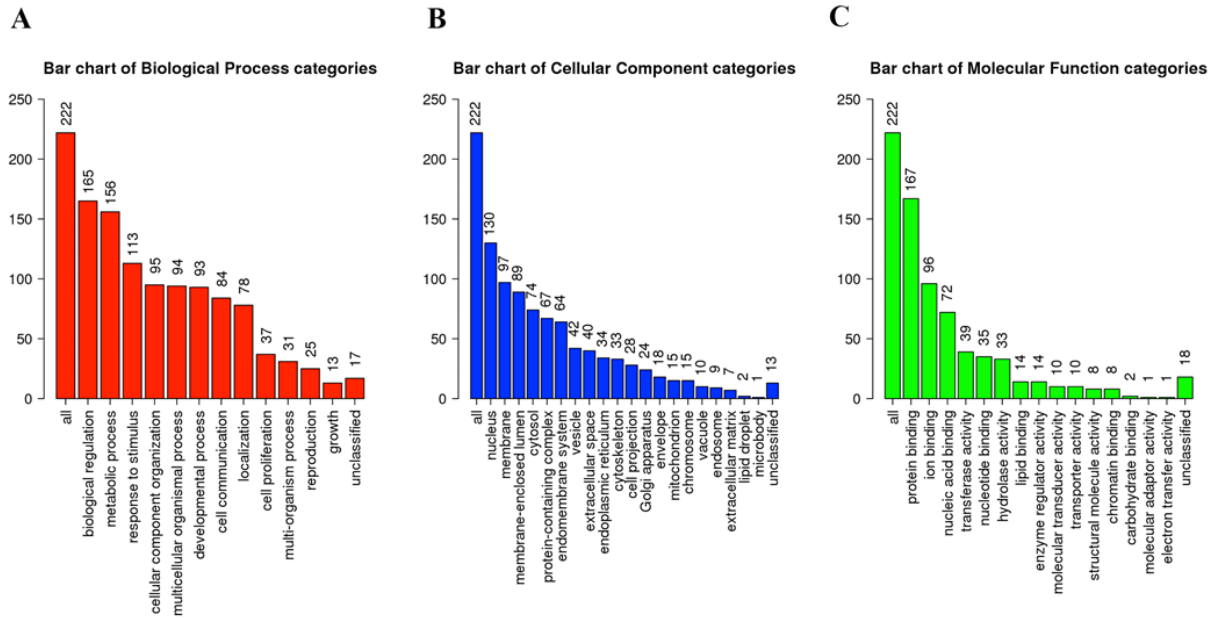

**Supplementary Figure S3.** A-B-C) GO term enrichment analysis of DE miRNA-181a and -181b-predicted target genes between A375 and A375-BIR. Bar plots shows the distribution of GO Biological Process Gene set (A), GO Cellular Component (B), Molecular Function (C) ranked by gene number.

**Supplemental Table S1.** Differentially expressed miRNA181a/b-target genes between A375 and A375-BIR cell lines.

| Gene Name | EnsemblGeneID   | logFC        | Pvalue      | FDR         | regulation | Representative miRNA |
|-----------|-----------------|--------------|-------------|-------------|------------|----------------------|
| LIMCH1    | ENSG00000064042 | -4.892335943 | 1.75631E-68 | 3.45889E-66 | DOWN       | hsa-miR-181a-5p      |
| HS3ST3A1  | ENSG00000153976 | -6.778414602 | 2.14351E-66 | 3.89672E-64 | DOWN       | hsa-miR-181a-5p      |
| PAWR      | ENSG00000177425 | -2.208172689 | 7.96001E-50 | 8.00406E-48 | DOWN       | hsa-miR-181a-5p      |
| COL5A1    | ENSG00000130635 | -8.506989947 | 4.05663E-40 | 2.8557E-38  | DOWN       | hsa-miR-181a-5p      |
| BMPR2     | ENSG00000204217 | -2.765427956 | 6.76237E-33 | 3.37975E-31 | DOWN       | hsa-miR-181a-5p      |
| LBR       | ENSG00000143815 | -2.041225474 | 2.04311E-28 | 7.56134E-27 | DOWN       | hsa-miR-181b-5p      |
| CCNG1     | ENSG00000113328 | -2.336311377 | 7.0267E-26  | 2.25714E-24 | DOWN       | hsa-miR-181b-5p      |
| MPP5      | ENSG00000072415 | -1.645318721 | 9.4931E-25  | 2.80436E-23 | DOWN       | hsa-miR-181a-5p      |
| CNKSR2    | ENSG00000149970 | -4.302359101 | 1.9331E-23  | 5.25975E-22 | DOWN       | hsa-miR-181b-5p      |
| SLC16A7   | ENSG00000118596 | -1.630638997 | 6.97174E-23 | 1.79089E-21 | DOWN       | hsa-miR-181a-5p      |
| TM9SF3    | ENSG00000077147 | -1.271388243 | 2.14836E-22 | 5.34442E-21 | DOWN       | hsa-miR-181a-5p      |
| ONECUT2   | ENSG00000119547 | -4.59577696  | 1.56087E-21 | 3.67304E-20 | DOWN       | hsa-miR-181a-5p      |
| HMGB2     | ENSG00000164104 | -1.505499462 | 1.00485E-19 | 2.07531E-18 | DOWN       | hsa-miR-181a-5p      |
| SCD       | ENSG00000099194 | -1.793560571 | 1.3231E-17  | 2.30401E-16 | DOWN       | hsa-miR-181a-5p      |
| FIGN      | ENSG00000182263 | -2.376542174 | 1.22154E-16 | 1.98702E-15 | DOWN       | hsa-miR-181a-5p      |
| TSC22D2   | ENSG00000196428 | -1.827370225 | 1.94851E-16 | 3.11442E-15 | DOWN       | hsa-miR-181a-5p      |
| TFAM      | ENSG00000108064 | -1.229275427 | 9.74288E-16 | 1.4814E-14  | DOWN       | hsa-miR-181b-5p      |
| LIN28B    | ENSG00000187772 | -5.442900493 | 6.6211E-15  | 9.1736E-14  | DOWN       | hsa-miR-181a-5p      |
| EXT1      | ENSG00000182197 | -1.602788385 | 1.26763E-14 | 1.71326E-13 | DOWN       | hsa-miR-181a-5p      |
| ZNF33B    | ENSG00000196693 | -2.046951807 | 3.55692E-13 | 4.27321E-12 | DOWN       | hsa-miR-181a-5p      |
| GHITM     | ENSG00000165678 | -1.199822632 | 4.80712E-13 | 5.69658E-12 | DOWN       | hsa-miR-181a-5p      |
| SRSF7     | ENSG00000115875 | -1.190101567 | 6.26E-13    | 7.3135E-12  | DOWN       | hsa-miR-181a-5p      |
| VCAN      | ENSG00000038427 | -1.305481435 | 6.3963E-13  | 7.46023E-12 | DOWN       | hsa-miR-181a-5p      |
| PCNP      | ENSG00000081154 | -1.124780814 | 1.16704E-12 | 1.32598E-11 | DOWN       | hsa-miR-181a-5p      |
| OGT       | ENSG00000147162 | -1.818760551 | 2.69423E-12 | 2.92843E-11 | DOWN       | hsa-miR-181a-5p      |
| GNAQ      | ENSG00000156052 | -1.048377924 | 5.39888E-12 | 5.71059E-11 | DOWN       | hsa-miR-181a-5p      |
| NEK7      | ENSG00000151414 | -1.645883549 | 1.40919E-11 | 1.41888E-10 | DOWN       | hsa-miR-181a-5p      |
| ARL5A     | ENSG00000162980 | -1.165455656 | 2.63661E-10 | 2.3005E-09  | DOWN       | hsa-miR-181a-5p      |
| CREBZF    | ENSG00000137504 | -1.068320616 | 3.29854E-10 | 2.84355E-09 | DOWN       | hsa-miR-181a-5p      |
| PHF3      | ENSG00000118482 | -0.914596443 | 1.29688E-09 | 1.044E-08   | DOWN       | hsa-miR-181a-5p      |
| SLITRK1   | ENSG00000178235 | -6.336558584 | 2.22561E-09 | 1.73835E-08 | DOWN       | hsa-miR-181b-5p      |

|          |                 |              |             |             |      |                 |
|----------|-----------------|--------------|-------------|-------------|------|-----------------|
| AHNAK    | ENSG00000124942 | -0.925752413 | 2.71715E-09 | 2.09459E-08 | DOWN | hsa-miR-181a-5p |
| PDCD6IP  | ENSG00000170248 | -0.988862982 | 3.07228E-09 | 2.34756E-08 | DOWN | hsa-miR-181a-5p |
| MAP2K1   | ENSG00000169032 | -2.178695479 | 3.12974E-09 | 2.38706E-08 | DOWN | hsa-miR-181a-5p |
| PBX1     | ENSG00000185630 | -6.617336657 | 5.70747E-09 | 4.20386E-08 | DOWN | hsa-miR-181a-5p |
| PARM1    | ENSG00000169116 | -3.878453652 | 6.56394E-09 | 4.8005E-08  | DOWN | hsa-miR-181a-5p |
| ARL3     | ENSG00000138175 | -1.130402403 | 8.39941E-09 | 6.08902E-08 | DOWN | hsa-miR-181a-5p |
| MBOAT2   | ENSG00000143797 | -0.908716715 | 9.58399E-09 | 6.90841E-08 | DOWN | hsa-miR-181a-5p |
| NIPBL    | ENSG00000164190 | -1.053505701 | 1.47346E-08 | 1.03947E-07 | DOWN | hsa-miR-181a-5p |
| ZNF283   | ENSG00000167637 | -1.620418794 | 2.41763E-08 | 1.66299E-07 | DOWN | hsa-miR-181a-5p |
| ELAVL2   | ENSG00000107105 | -5.832120127 | 2.5428E-08  | 1.74257E-07 | DOWN | hsa-miR-181a-5p |
| RIMKLB   | ENSG00000166532 | -1.452518261 | 6.03138E-08 | 3.92052E-07 | DOWN | hsa-miR-181a-5p |
| UBE2W    | ENSG00000104343 | -1.283063457 | 6.31976E-08 | 4.09349E-07 | DOWN | hsa-miR-181a-5p |
| DUSP5    | ENSG00000138166 | -1.245675844 | 6.32701E-08 | 4.09659E-07 | DOWN | hsa-miR-181a-5p |
| MYBL1    | ENSG00000185697 | -0.841747723 | 7.08628E-08 | 4.54902E-07 | DOWN | hsa-miR-181a-5p |
| LYRM1    | ENSG00000102897 | -1.890940993 | 7.56963E-08 | 4.84453E-07 | DOWN | hsa-miR-181a-5p |
| HNRNPR   | ENSG00000125944 | -0.788562279 | 9.4723E-08  | 5.98093E-07 | DOWN | hsa-miR-181b-5p |
| THRB     | ENSG00000151090 | -1.979534898 | 9.98892E-08 | 6.29747E-07 | DOWN | hsa-miR-181a-5p |
| TRNP1    | ENSG00000253368 | -1.086599175 | 1.4659E-07  | 9.01839E-07 | DOWN | hsa-miR-181a-5p |
| SAMHD1   | ENSG00000101347 | -1.429199756 | 3.25149E-07 | 1.89399E-06 | DOWN | hsa-miR-181a-5p |
| YOD1     | ENSG00000180667 | -1.890981939 | 3.84324E-07 | 2.21915E-06 | DOWN | hsa-miR-181a-5p |
| ADAMTS5  | ENSG00000154736 | -3.27033551  | 4.21426E-07 | 2.41067E-06 | DOWN | hsa-miR-181a-5p |
| ZNF397   | ENSG00000186812 | -1.18742709  | 5.63732E-07 | 3.15488E-06 | DOWN | hsa-miR-181a-5p |
| FAM19A2  | ENSG00000198673 | -1.995559751 | 7.79024E-07 | 4.2617E-06  | DOWN | hsa-miR-181a-5p |
| TGFBR1   | ENSG00000106799 | -1.6874707   | 8.22208E-07 | 4.48607E-06 | DOWN | hsa-miR-181b-5p |
| PRPF40A  | ENSG00000196504 | -0.577612056 | 8.38038E-07 | 4.56492E-06 | DOWN | hsa-miR-181a-5p |
| RORB     | ENSG00000198963 | -3.319796576 | 9.19695E-07 | 4.98346E-06 | DOWN | hsa-miR-181a-5p |
| PDCD4    | ENSG00000150593 | -1.125899036 | 1.18805E-06 | 6.32566E-06 | DOWN | hsa-miR-181a-5p |
| ETS1     | ENSG00000134954 | -0.95375958  | 1.24007E-06 | 6.57306E-06 | DOWN | hsa-miR-181a-5p |
| RORA     | ENSG00000069667 | -1.429349405 | 1.56704E-06 | 8.18291E-06 | DOWN | hsa-miR-181a-5p |
| AFF1     | ENSG00000172493 | -2.805671516 | 2.01167E-06 | 1.03159E-05 | DOWN | hsa-miR-181a-5p |
| CAND1    | ENSG00000111530 | -0.694653319 | 3.62783E-06 | 1.7867E-05  | DOWN | hsa-miR-181a-5p |
| ANKRD13C | ENSG00000118454 | -1.538794104 | 4.27345E-06 | 2.07671E-05 | DOWN | hsa-miR-181a-5p |
| PNISR    | ENSG00000132424 | -1.003934423 | 5.17441E-06 | 2.49055E-05 | DOWN | hsa-miR-181a-5p |
| DDX52    | ENSG00000278053 | -0.736751213 | 5.90061E-06 | 2.80984E-05 | DOWN | hsa-miR-181a-5p |
| SMAD2    | ENSG00000175387 | -0.747935495 | 7.90833E-06 | 3.68944E-05 | DOWN | hsa-miR-181a-5p |
| KPNA4    | ENSG00000186432 | -0.593409129 | 1.24126E-05 | 5.61042E-05 | DOWN | hsa-miR-181a-5p |
| MAPK8    | ENSG00000107643 | -1.298354591 | 1.57507E-05 | 7.00442E-05 | DOWN | hsa-miR-181a-5p |
| FBXL3    | ENSG00000005812 | -1.906359667 | 2.03389E-05 | 8.86136E-05 | DOWN | hsa-miR-181a-5p |
| SIAE     | ENSG00000110013 | -1.290672909 | 3.14379E-05 | 0.000132134 | DOWN | hsa-miR-181a-5p |
| OSBPL8   | ENSG00000091039 | -0.617480744 | 3.24496E-05 | 0.000136178 | DOWN | hsa-miR-181a-5p |
| ZNF268   | ENSG00000090612 | -1.245041076 | 3.34151E-05 | 0.000139786 | DOWN | hsa-miR-181a-5p |
| SLC35E1  | ENSG00000127526 | -0.632351514 | 3.79774E-05 | 0.000157065 | DOWN | hsa-miR-181a-5p |
| AK3      | ENSG00000147853 | -0.637241611 | 4.12564E-05 | 0.000169398 | DOWN | hsa-miR-181a-5p |
| UBP1     | ENSG00000153560 | -0.748481233 | 4.24062E-05 | 0.000173645 | DOWN | hsa-miR-181a-5p |
| EXOSC3   | ENSG00000107371 | -1.371786472 | 6.03417E-05 | 0.000240017 | DOWN | hsa-miR-181a-5p |
| QKI      | ENSG00000112531 | -0.689135341 | 6.08129E-05 | 0.000241485 | DOWN | hsa-miR-181a-5p |
| E2F7     | ENSG00000165891 | -0.850226841 | 9.60042E-05 | 0.000367129 | DOWN | hsa-miR-181a-5p |
| ARL1     | ENSG00000120805 | -0.581958384 | 0.000134036 | 0.000498507 | DOWN | hsa-miR-181a-5p |
| GREB1L   | ENSG00000141449 | -1.298909662 | 0.000137707 | 0.000510667 | DOWN | hsa-miR-181a-5p |
| MELK     | ENSG00000165304 | -1.322975538 | 0.000142146 | 0.000526066 | DOWN | hsa-miR-181a-5p |
| C14orf28 | ENSG00000179476 | -4.736785219 | 0.000205424 | 0.000737803 | DOWN | hsa-miR-181a-5p |
| BIRC6    | ENSG00000115760 | -0.609950485 | 0.000235572 | 0.000835204 | DOWN | hsa-miR-181a-5p |
| ZFP36L2  | ENSG00000152518 | -0.803477461 | 0.00023576  | 0.000835692 | DOWN | hsa-miR-181a-5p |
| ADAT2    | ENSG00000189007 | -0.933322433 | 0.000280038 | 0.000977355 | DOWN | hsa-miR-181a-5p |
| NUDT21   | ENSG00000167005 | -0.64820926  | 0.00028694  | 0.000999968 | DOWN | hsa-miR-181b-5p |
| SLC35G1  | ENSG00000176273 | -1.249834096 | 0.000369898 | 0.001264826 | DOWN | hsa-miR-181a-5p |
| BTG2     | ENSG00000159388 | -1.542476348 | 0.000411555 | 0.001392303 | DOWN | hsa-miR-181a-5p |
| PAX9     | ENSG00000198807 | -2.236854897 | 0.000477596 | 0.001591314 | DOWN | hsa-miR-181a-5p |
| CYLD     | ENSG00000083799 | -0.811983572 | 0.000508894 | 0.001683936 | DOWN | hsa-miR-181a-5p |
| DNAJB14  | ENSG00000164031 | -0.620000128 | 0.000536383 | 0.001763741 | DOWN | hsa-miR-181a-5p |
| IARS2    | ENSG00000067704 | -0.729843102 | 0.000556254 | 0.001822561 | DOWN | hsa-miR-181a-5p |
| RASSF1   | ENSG00000068028 | -1.162325239 | 0.000561251 | 0.001836386 | DOWN | hsa-miR-181a-5p |
| ARSJ     | ENSG00000180801 | -1.014506292 | 0.000610609 | 0.001984148 | DOWN | hsa-miR-181a-5p |

|           |                  |              |             |             |      |                 |
|-----------|------------------|--------------|-------------|-------------|------|-----------------|
| CCAR1     | ENSG00000060339  | -0.762830687 | 0.000637796 | 0.002065594 | DOWN | hsa-miR-181a-5p |
| DCUN1D1   | ENSG00000043093  | -0.921907234 | 0.000645488 | 0.002088871 | DOWN | hsa-miR-181a-5p |
| MOSPD1    | ENSG000000101928 | -1.106041237 | 0.000665119 | 0.002147779 | DOWN | hsa-miR-181a-5p |
| ANKFY1    | ENSG000000185722 | -0.773256383 | 0.00077027  | 0.002453325 | DOWN | hsa-miR-181a-5p |
| IPPK      | ENSG000000127080 | -1.355114065 | 0.000781392 | 0.002485402 | DOWN | hsa-miR-181a-5p |
| WDFY3     | ENSG000000163625 | -1.007679657 | 0.000963008 | 0.002999823 | DOWN | hsa-miR-181a-5p |
| LMBRD2    | ENSG000000164187 | -0.6589327   | 0.00108834  | 0.003352152 | DOWN | hsa-miR-181a-5p |
| USP47     | ENSG000000170242 | -0.521047543 | 0.001334158 | 0.004029099 | DOWN | hsa-miR-181a-5p |
| SCOC      | ENSG000000153130 | -0.578951579 | 0.001380351 | 0.004157892 | DOWN | hsa-miR-181a-5p |
| TTL7      | ENSG000000137941 | -0.897900825 | 0.001383309 | 0.004165287 | DOWN | hsa-miR-181a-5p |
| CYP26B1   | ENSG00000003137  | -4.128100732 | 0.001401248 | 0.004211635 | DOWN | hsa-miR-181a-5p |
| USP33     | ENSG00000077254  | -0.441431181 | 0.00167095  | 0.004902895 | DOWN | hsa-miR-181a-5p |
| SMAP1     | ENSG000000112305 | -0.604182863 | 0.001781628 | 0.005194479 | DOWN | hsa-miR-181a-5p |
| CDH8      | ENSG000000150394 | -3.285202672 | 0.002063629 | 0.005931992 | DOWN | hsa-miR-181a-5p |
| MIER3     | ENSG000000155545 | -1.066477131 | 0.002184561 | 0.006238425 | DOWN | hsa-miR-181a-5p |
| PNRC1     | ENSG000000146278 | -0.75097866  | 0.002273858 | 0.006462194 | DOWN | hsa-miR-181a-5p |
| ZFP30     | ENSG000000120784 | -1.39866113  | 0.002511546 | 0.007057669 | DOWN | hsa-miR-181a-5p |
| DEK       | ENSG000000124795 | -0.400608658 | 0.002535155 | 0.007117968 | DOWN | hsa-miR-181a-5p |
| KLHL2     | ENSG000000109466 | -1.202151843 | 0.002899202 | 0.008032405 | DOWN | hsa-miR-181a-5p |
| KLHL5     | ENSG000000109790 | -0.803006154 | 0.003382893 | 0.009205987 | DOWN | hsa-miR-181a-5p |
| ATP1B1    | ENSG000000143153 | -0.525394267 | 0.003475992 | 0.009422142 | DOWN | hsa-miR-181a-5p |
| MLF1      | ENSG000000178053 | -0.760696719 | 0.003545472 | 0.009594756 | DOWN | hsa-miR-181b-5p |
| TNFRSF11B | ENSG000000164761 | -3.902731475 | 0.003877789 | 0.010383662 | DOWN | hsa-miR-181a-5p |
| BCLAF1    | ENSG000000029363 | -0.489477862 | 0.004146608 | 0.011028511 | DOWN | hsa-miR-181a-5p |
| SIRT1     | ENSG000000096717 | -1.31470565  | 0.004203111 | 0.011157264 | DOWN | hsa-miR-181a-5p |
| CNR1      | ENSG000000118432 | -2.055247329 | 0.004719313 | 0.01238249  | DOWN | hsa-miR-181a-5p |
| LCLAT1    | ENSG000000172954 | -0.678667271 | 0.006284576 | 0.015965256 | DOWN | hsa-miR-181a-5p |
| RAB11A    | ENSG000000103769 | -0.389587144 | 0.008814578 | 0.021406277 | DOWN | hsa-miR-181a-5p |
| ZFP1      | ENSG000000184517 | -1.094080871 | 0.00972314  | 0.023342027 | DOWN | hsa-miR-181b-5p |
| NLK       | ENSG000000087095 | -0.656526756 | 0.009802884 | 0.02348575  | DOWN | hsa-miR-181a-5p |
| RABGEF1   | ENSG000000154710 | -0.689886204 | 0.011949868 | 0.027906078 | DOWN | hsa-miR-181a-5p |
| SIM1      | ENSG000000112246 | -4.077719764 | 0.013128184 | 0.030273146 | DOWN | hsa-miR-181a-5p |
| CCNJ      | ENSG000000107443 | -1.20313765  | 0.014504244 | 0.033081995 | DOWN | hsa-miR-181a-5p |
| CHD1      | ENSG000000153922 | -0.384467031 | 0.018589315 | 0.041074266 | DOWN | hsa-miR-181a-5p |
| CNTN4     | ENSG000000144619 | -3.404133924 | 0.019297218 | 0.042434386 | DOWN | hsa-miR-181a-5p |
| ZFP14     | ENSG000000142065 | -0.87415752  | 0.022401092 | 0.048344034 | DOWN | hsa-miR-181a-5p |
| EYA3      | ENSG000000158161 | -0.45716329  | 0.023037013 | 0.049448722 | DOWN | hsa-miR-181a-5p |
| LRR8D     | ENSG000000171492 | -0.606533119 | 0.023271041 | 0.04982836  | DOWN | hsa-miR-181a-5p |
| ITGB8     | ENSG000000105855 | 4.11679502   | 1.99738E-58 | 2.62244E-56 | UP   | hsa-miR-181a-5p |
| QDPR      | ENSG000000151552 | 2.188615561  | 5.73138E-47 | 5.04331E-45 | UP   | hsa-miR-181b-5p |
| CLASP1    | ENSG000000074054 | 2.574128925  | 1.59279E-37 | 9.90586E-36 | UP   | hsa-miR-181a-5p |
| ENTPD6    | ENSG000000197586 | 2.45500107   | 6.80412E-37 | 4.07828E-35 | UP   | hsa-miR-181a-5p |
| TRIM2     | ENSG000000109654 | 2.875650233  | 4.43541E-35 | 2.44583E-33 | UP   | hsa-miR-181a-5p |
| SPRY4     | ENSG000000187678 | 2.291291849  | 1.6314E-33  | 8.40753E-32 | UP   | hsa-miR-181a-5p |
| CXADR     | ENSG000000154639 | 2.489368656  | 7.10772E-31 | 3.15236E-29 | UP   | hsa-miR-181a-5p |
| ARNT2     | ENSG000000172379 | 2.565400227  | 8.59717E-30 | 3.52911E-28 | UP   | hsa-miR-181a-5p |
| ZKSCAN1   | ENSG000000106261 | 1.393700648  | 1.42744E-25 | 4.46393E-24 | UP   | hsa-miR-181a-5p |
| CLUH      | ENSG000000132361 | 1.821405239  | 2.33337E-23 | 6.2461E-22  | UP   | hsa-miR-181b-5p |
| MAP3K3    | ENSG000000198909 | 1.386409569  | 4.7578E-23  | 1.24538E-21 | UP   | hsa-miR-181b-5p |
| PKNOX2    | ENSG000000165495 | 5.65913103   | 6.29296E-22 | 1.51756E-20 | UP   | hsa-miR-181a-5p |
| COL16A1   | ENSG000000084636 | 3.227286451  | 8.21713E-22 | 1.96723E-20 | UP   | hsa-miR-181a-5p |
| NREP      | ENSG000000134986 | 2.218810013  | 3.94242E-20 | 8.36146E-19 | UP   | hsa-miR-181b-5p |
| MLXIP     | ENSG000000175727 | 1.531710805  | 1.18148E-17 | 2.06827E-16 | UP   | hsa-miR-181a-5p |
| TANC2     | ENSG000000170921 | 1.851445769  | 4.33625E-17 | 7.21676E-16 | UP   | hsa-miR-181a-5p |
| BAZ2B     | ENSG000000123636 | 1.455969509  | 3.18542E-16 | 5.00441E-15 | UP   | hsa-miR-181a-5p |
| LPCAT2    | ENSG000000087253 | 2.110073843  | 2.60273E-15 | 3.78024E-14 | UP   | hsa-miR-181a-5p |
| SOX5      | ENSG000000134532 | 1.664684799  | 2.74628E-14 | 3.6143E-13  | UP   | hsa-miR-181b-5p |
| FMNL2     | ENSG000000157827 | 1.010479036  | 6.58256E-14 | 8.4219E-13  | UP   | hsa-miR-181a-5p |
| UNKL      | ENSG000000059145 | 1.678081426  | 1.79259E-12 | 1.99159E-11 | UP   | hsa-miR-181a-5p |
| TBC1D4    | ENSG000000136111 | 1.246033295  | 1.79954E-12 | 1.99797E-11 | UP   | hsa-miR-181a-5p |
| ARHGEF3   | ENSG000000163947 | 1.503979877  | 3.07601E-12 | 3.33245E-11 | UP   | hsa-miR-181a-5p |
| ANKRD44   | ENSG000000065413 | 2.471876054  | 2.13181E-11 | 2.12194E-10 | UP   | hsa-miR-181a-5p |
| EPN2      | ENSG000000072134 | 1.147838113  | 4.81431E-11 | 4.5851E-10  | UP   | hsa-miR-181a-5p |

|          |                 |             |             |             |    |                 |
|----------|-----------------|-------------|-------------|-------------|----|-----------------|
| AAK1     | ENSG00000115977 | 1.03579411  | 8.40986E-11 | 7.77665E-10 | UP | hsa-miR-181a-5p |
| HEY2     | ENSG00000135547 | 3.677318371 | 1.09098E-10 | 9.97687E-10 | UP | hsa-miR-181a-5p |
| ZNF697   | ENSG00000143067 | 1.309992037 | 3.25878E-10 | 2.81074E-09 | UP | hsa-miR-181a-5p |
| ZNF536   | ENSG00000198597 | 3.280196661 | 6.65352E-10 | 5.55905E-09 | UP | hsa-miR-181a-5p |
| CALR     | ENSG00000179218 | 0.852859372 | 9.4939E-10  | 7.79829E-09 | UP | hsa-miR-181a-5p |
| GNAO1    | ENSG00000087258 | 1.83437639  | 1.19328E-09 | 9.63421E-09 | UP | hsa-miR-181a-5p |
| MAP1A    | ENSG00000166963 | 2.176761633 | 1.62744E-09 | 1.29499E-08 | UP | hsa-miR-181a-5p |
| DNAJB1   | ENSG00000132002 | 0.992257414 | 3.62773E-09 | 2.74034E-08 | UP | hsa-miR-181a-5p |
| KANK1    | ENSG00000107104 | 1.791456675 | 4.23303E-09 | 3.17008E-08 | UP | hsa-miR-181a-5p |
| ZNF652   | ENSG00000198740 | 0.971146023 | 5.8379E-09  | 4.29419E-08 | UP | hsa-miR-181a-5p |
| BPTF     | ENSG00000171634 | 0.749707939 | 1.19431E-08 | 8.52351E-08 | UP | hsa-miR-181a-5p |
| APLP2    | ENSG00000084234 | 0.782878419 | 3.30364E-08 | 2.22344E-07 | UP | hsa-miR-181a-5p |
| CPNE2    | ENSG00000140848 | 1.86246615  | 7.96971E-08 | 5.07283E-07 | UP | hsa-miR-181a-5p |
| PDAP1    | ENSG00000106244 | 0.820727341 | 1.00154E-07 | 6.30701E-07 | UP | hsa-miR-181a-5p |
| SRPK2    | ENSG00000135250 | 0.739285527 | 2.12914E-07 | 1.2771E-06  | UP | hsa-miR-181a-5p |
| GDPD1    | ENSG00000153982 | 1.405684301 | 2.29679E-07 | 1.37318E-06 | UP | hsa-miR-181a-5p |
| PIK3R3   | ENSG00000117461 | 1.66620256  | 3.51106E-07 | 2.03516E-06 | UP | hsa-miR-181a-5p |
| UBE3C    | ENSG00000009335 | 0.816836209 | 4.91128E-07 | 2.77579E-06 | UP | hsa-miR-181a-5p |
| IL1RAPL1 | ENSG00000169306 | 0.918618059 | 6.02705E-07 | 3.3537E-06  | UP | hsa-miR-181b-5p |
| FAM222B  | ENSG00000173065 | 0.918525672 | 6.44457E-07 | 3.56683E-06 | UP | hsa-miR-181a-5p |
| PDXDC1   | ENSG00000179889 | 0.811855949 | 1.18775E-06 | 6.32566E-06 | UP | hsa-miR-181b-5p |
| RNF125   | ENSG00000101695 | 1.711735665 | 1.73337E-06 | 8.99189E-06 | UP | hsa-miR-181b-5p |
| TRIM13   | ENSG00000204977 | 0.991341381 | 2.04993E-06 | 1.04958E-05 | UP | hsa-miR-181a-5p |
| ZSWIM1   | ENSG00000168612 | 1.856446412 | 1.45176E-06 | 1.22439E-05 | UP | hsa-miR-181a-5p |
| PDIA6    | ENSG00000143870 | 0.731822262 | 2.82354E-06 | 1.41502E-05 | UP | hsa-miR-181a-5p |
| ELMSAN1  | ENSG00000156030 | 1.004051921 | 1.21882E-05 | 5.51502E-05 | UP | hsa-miR-181a-5p |
| TUBD1    | ENSG00000108423 | 1.650157299 | 2.04642E-05 | 8.91127E-05 | UP | hsa-miR-181a-5p |
| LIF      | ENSG00000128342 | 3.280555709 | 2.51628E-05 | 0.000107869 | UP | hsa-miR-181b-5p |
| RNF8     | ENSG00000112130 | 0.880071915 | 3.23284E-05 | 0.000135704 | UP | hsa-miR-181b-5p |
| TUBB     | ENSG00000196230 | 0.759580106 | 3.83285E-05 | 0.00015823  | UP | hsa-miR-181a-5p |
| SACM1L   | ENSG00000211456 | 0.841042797 | 4.51536E-05 | 0.000183939 | UP | hsa-miR-181b-5p |
| RLF      | ENSG00000117000 | 0.685125252 | 7.63973E-05 | 0.000297654 | UP | hsa-miR-181a-5p |
| GSE1     | ENSG00000131149 | 0.875186721 | 0.000109557 | 0.000413698 | UP | hsa-miR-181b-5p |
| CKAP4    | ENSG00000136026 | 0.425800343 | 0.000128658 | 0.000480448 | UP | hsa-miR-181a-5p |
| PGRMC2   | ENSG00000164040 | 0.728308702 | 0.000283486 | 0.000988765 | UP | hsa-miR-181a-5p |
| ZFAND6   | ENSG00000086666 | 0.742098602 | 0.000328557 | 0.001134721 | UP | hsa-miR-181a-5p |
| CEP350   | ENSG00000135837 | 0.478703072 | 0.000439451 | 0.00147791  | UP | hsa-miR-181a-5p |
| TMCC1    | ENSG00000172765 | 0.664020688 | 0.000441756 | 0.001484456 | UP | hsa-miR-181b-5p |
| ACVR1C   | ENSG00000123612 | 2.040718863 | 0.000479588 | 0.001596984 | UP | hsa-miR-181a-5p |
| PSPC1    | ENSG00000121390 | 0.8472819   | 0.000598975 | 0.001949026 | UP | hsa-miR-181a-5p |
| PRDM4    | ENSG00000110851 | 0.684679525 | 0.000732263 | 0.002346732 | UP | hsa-miR-181a-5p |
| SERTAD4  | ENSG00000082497 | 0.536522245 | 0.001054932 | 0.00325957  | UP | hsa-miR-181a-5p |
| RAB8B    | ENSG00000166128 | 0.817779824 | 0.001306916 | 0.003955416 | UP | hsa-miR-181a-5p |
| ZCCHC14  | ENSG00000140948 | 1.147409318 | 0.001679727 | 0.004927776 | UP | hsa-miR-181a-5p |
| SLC44A1  | ENSG00000070214 | 0.414116406 | 0.001889162 | 0.005480955 | UP | hsa-miR-181a-5p |
| SBNO1    | ENSG00000139697 | 0.487773891 | 0.001976197 | 0.00570218  | UP | hsa-miR-181a-5p |
| DNAJC5   | ENSG00000101152 | 0.523885569 | 0.002128589 | 0.006094366 | UP | hsa-miR-181a-5p |
| PRKCD    | ENSG00000163932 | 0.686478865 | 0.002456459 | 0.006921684 | UP | hsa-miR-181a-5p |
| IGSF11   | ENSG00000144847 | 4.265701215 | 0.002484424 | 0.006992145 | UP | hsa-miR-181a-5p |
| MCL1     | ENSG00000143384 | 0.417887978 | 0.002875235 | 0.007978031 | UP | hsa-miR-181a-5p |
| MYO1E    | ENSG00000157483 | 0.550687761 | 0.003282618 | 0.008965552 | UP | hsa-miR-181a-5p |
| OSBPL3   | ENSG00000070882 | 0.595546174 | 0.004563892 | 0.01201854  | UP | hsa-miR-181b-5p |
| SEC24C   | ENSG00000176986 | 0.801493454 | 0.004915127 | 0.01284533  | UP | hsa-miR-181a-5p |
| FAM160A2 | ENSG00000051009 | 1.009536397 | 0.0066642   | 0.01680065  | UP | hsa-miR-181a-5p |
| KMT2E    | ENSG00000005483 | 0.35116421  | 0.007095418 | 0.017779384 | UP | hsa-miR-181a-5p |
| WSB2     | ENSG00000176871 | 0.771362728 | 0.007173626 | 0.017921065 | UP | hsa-miR-181a-5p |
| LRRC32   | ENSG00000137507 | 4.196658545 | 0.008107477 | 0.019902358 | UP | hsa-miR-181a-5p |
| B3GALT1  | ENSG00000172318 | 2.322533622 | 0.009626309 | 0.023136426 | UP | hsa-miR-181b-5p |
| MOB3B    | ENSG00000120162 | 0.871244588 | 0.011015873 | 0.026033655 | UP | hsa-miR-181a-5p |
| SEMA4F   | ENSG00000135622 | 1.077324979 | 0.015853953 | 0.035731872 | UP | hsa-miR-181a-5p |
| MAPRE2   | ENSG00000166974 | 0.507593429 | 0.016724638 | 0.037423136 | UP | hsa-miR-181a-5p |
| ZDHHC7   | ENSG00000153786 | 0.719411413 | 0.019015102 | 0.041880819 | UP | hsa-miR-181a-5p |
| RNF34    | ENSG00000170633 | 0.504165776 | 0.019106356 | 0.042048789 | UP | hsa-miR-181b-5p |

|       |                 |             |             |             |    |                 |
|-------|-----------------|-------------|-------------|-------------|----|-----------------|
| STAT3 | ENSG00000168610 | 0.451031614 | 0.019288654 | 0.042426832 | UP | hsa-miR-181b-5p |
| TRIP4 | ENSG00000103671 | 0.926371266 | 0.019312397 | 0.042450834 | UP | hsa-miR-181a-5p |

**Supplemental Table S2.** Functional annotation of target genes negatively regulated by miRNA 181a/b in melanoma.

| Functional Category                                            | Enrichment FDR | Genes in list | Genes                                                              |
|----------------------------------------------------------------|----------------|---------------|--------------------------------------------------------------------|
| Regulation of biosynthetic process                             | 0.017090142    | 11            | CCNK ANKRD13C UBP1 SS18L1 ZFP36L1 TFAM ZNF791 PAWR ARID2 ATG7 TMF1 |
| Regulation of macromolecule biosynthetic process               | 0.017090142    | 11            | CCNK ANKRD13C UBP1 SS18L1 ZFP36L1 TFAM ZNF791 PAWR ARID2 ATG7 TMF1 |
| Regulation of cellular macromolecule biosynthetic process      | 0.026311351    | 10            | CCNK UBP1 SS18L1 ZFP36L1 TFAM ZNF791 PAWR ARID2 ATG7 TMF1          |
| Regulation of gene expression                                  | 0.026311351    | 10            | CCNK UBP1 SS18L1 ZFP36L1 TFAM LRRC32 TMF1 ZNF791 PAWR ARID2        |
| Regulation of nucleobase-containing compound metabolic process | 0.026311351    | 10            | CCNK UBP1 SS18L1 ZFP36L1 TFAM ZNF791 PAWR ARID2 ATG7 TMF1          |
| Regulation of cellular biosynthetic process                    | 0.026311351    | 10            | CCNK UBP1 SS18L1 ZFP36L1 TFAM ZNF791 PAWR ARID2 ATG7 TMF1          |
| Nucleic acid-templated transcription                           | 0.026311351    | 9             | CCNK UBP1 SS18L1 TFAM ZNF791 PAWR ZFP36L1 ARID2 TMF1               |
| Regulation of nucleic acid-templated transcription             | 0.026311351    | 9             | CCNK UBP1 SS18L1 TFAM ZNF791 PAWR ZFP36L1 ARID2 TMF1               |
| Transcription, DNA-templated                                   | 0.026311351    | 9             | CCNK UBP1 SS18L1 TFAM ZNF791 PAWR ZFP36L1 ARID2 TMF1               |
| Regulation of transcription, DNA-templated                     | 0.026311351    | 9             | CCNK UBP1 SS18L1 TFAM ZNF791 PAWR ZFP36L1 ARID2 TMF1               |
| Regulation of RNA biosynthetic process                         | 0.026311351    | 9             | CCNK UBP1 SS18L1 TFAM ZNF791 PAWR ZFP36L1 ARID2 TMF1               |
| Organelle organization                                         | 0.026311351    | 9             | NAA50 ATG7 ARID2 TFAM TMF1 PD CD6IP SS18L1 ATL3 PAWR               |
| RNA biosynthetic process                                       | 0.026311351    | 9             | CCNK UBP1 SS18L1 TFAM ZNF791 PAWR ZFP36L1 ARID2 TMF1               |
| Regulation of RNA metabolic process                            | 0.027906381    | 9             | CCNK UBP1 SS18L1 ZFP36L1 TFAM ZNF791 PAWR ARID2 TMF1               |
| Transcription by RNA polymerase II                             | 0.026311351    | 8             | CCNK UBP1 SS18L1 ZNF791 PAWR ZFP36L1 ARID2 TMF1                    |
| Regulation of transcription by RNA polymerase II               | 0.039387625    | 7             | CCNK UBP1 SS18L1 ZNF791 PAWR ZFP36L1 ARID2                         |
| Organic substance transport                                    | 0.041746665    | 7             | SLC16A7 ARL5A LRRC32 TMF1 PD CD6IP ZFP36L1 ATG7                    |
| Apoptotic process                                              | 0.039387625    | 6             | PAWR ANKRD13C TMF1 PD CD6IP ZFP36L1 ATG7                           |
| Programmed cell death                                          | 0.042301013    | 6             | PAWR ANKRD13C TMF1 PD CD6IP ZFP36L1 ATG7                           |
| Regulation of apoptotic process                                | 0.049169362    | 5             | PAWR ANKRD13C TMF1 ZFP36L1 ATG7                                    |
| Endomembrane system organization                               | 0.041746665    | 3             | TMF1 ATL3 PD CD6IP                                                 |
| Regulation of lymphocyte activation                            | 0.044943472    | 3             | LRRC32 PAWR ZFP36L1                                                |
| T cell activation                                              | 0.049545583    | 3             | LRRC32 PAWR ZFP36L1                                                |
| Regulation of cellular response to oxidative stress            | 0.026311351    | 2             | PAWR ATG7                                                          |
| Regulation of oxidative stress-induced cell death              | 0.026311351    | 2             | PAWR ATG7                                                          |
| Cell death in response to oxidative stress                     | 0.026311351    | 2             | PAWR ATG7                                                          |
| Negative regulation of T cell proliferation                    | 0.026311351    | 2             | LRRC32 PAWR                                                        |
| Regulation of response to oxidative stress                     | 0.027906381    | 2             | PAWR ATG7                                                          |
| Negative regulation of mononuclear cell proliferation          | 0.030401294    | 2             | LRRC32 PAWR                                                        |
| Negative regulation of lymphocyte proliferation                | 0.030401294    | 2             | LRRC32 PAWR                                                        |
| Negative regulation of leukocyte proliferation                 | 0.031684653    | 2             | LRRC32 PAWR                                                        |
| RegNetwork:RFX6                                                | 0.000458977    | 2             | CCNK SS18L1                                                        |
| RegNetwork:GABPA                                               | 0.005380083    | 9             | ZNF791 ZFP36L1 UBP1 TMF1 TFAM PD CD6IP NAA50 ATG7 ARID2            |
| RegNetwork:E2F4                                                | 0.012531471    | 5             | ZFP36L1 TFAM SS18L1 NAA50 ATL3                                     |
| RegNetwork:SMARCA4                                             | 0.005595281    | 2             | ARID2 TMF1                                                         |
